# Supplementary material for: Comparison of a dimeric and a monomeric indium-quinolinato complex: synthesis, structure and photoluminescence
Source: Royal Society of Chemistry journal article supplement (doi:10.1039/d0nj03865b), 2021-01-01
Supplement: d0nj03865b1.pdf [file d0nj03865b1.pdf]

# **Comparison of Homoleptic Indium-Quinolato Monomeric and Dimeric Complexes: Synthesis, Structure, Photoluminescence and Photo- Degradation**

## **Supplementary Information (SI)**

**For**

**Orbett T. Alexander,<sup>\*a</sup> Mart M. Duvenhage,<sup>b</sup> R. E. Kroon,<sup>b</sup> Alice Brink,<sup>\*a</sup>  
Hendrik G. Visser,<sup>\*a</sup>**

<sup>a</sup>*Department of Chemistry, University of the Free State, Bloemfontein 9300, South Africa*

<sup>b</sup>*Department of Physics, University of the Free State, Bloemfontein 9300, South Africa*

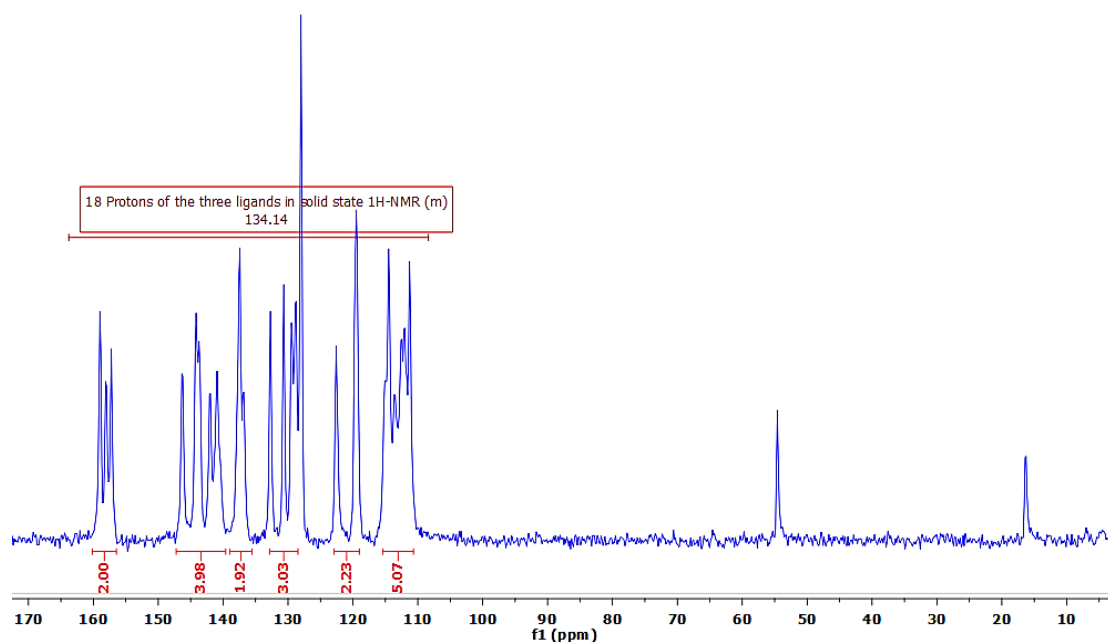

**Figure SI1:** Solid state  $^1\text{H-NMR}$  of  $[\text{In}(\text{Ox})_3] \cdot 2\text{H}_2\text{O}$  (**1**) indicating a meridional monomer.

**Figure SI2** depicts the solution state  $^1\text{H-NMR}$  spectra of **1** and **2** indicating *fac*- $\text{In}(\text{Ox})_3$  and the conformation of the  $[\text{In}_2(\text{Ox})_2\text{Cl}_2-\mu-\kappa^2-O, O'-(\text{Ox})_2]$  dimer.

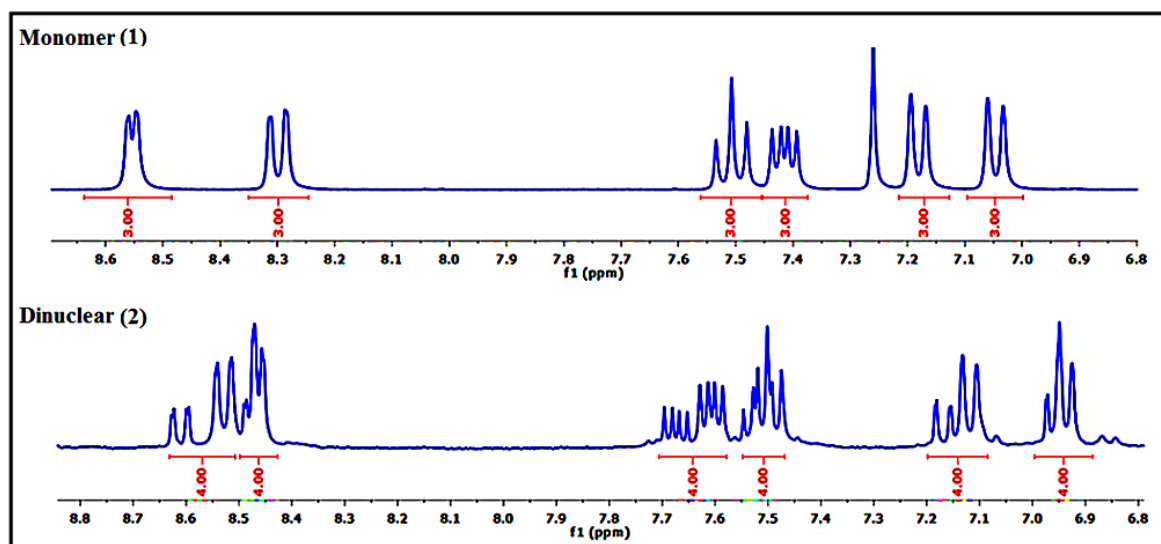

**Figure SI2:** The  $^1\text{H-NMR}$  exhibition of **1** and **2**.

The spectrum of **1** in **Figure SI2** exhibits six resonance environments integrating for three protons each for three 8-quinolato ligands in the monomer. The ligand resonance environments in a facial isomer are the same, hence only six are observed and not more,

whereas more resonance environments are expected in a meridional counterpart. There are also clustered/overlapping six (supposedly 12) resonance environments in **2**, however, integrating for four protons (*there are four 8-quinolato ligands in the dimer*) due to the symmetry therein.

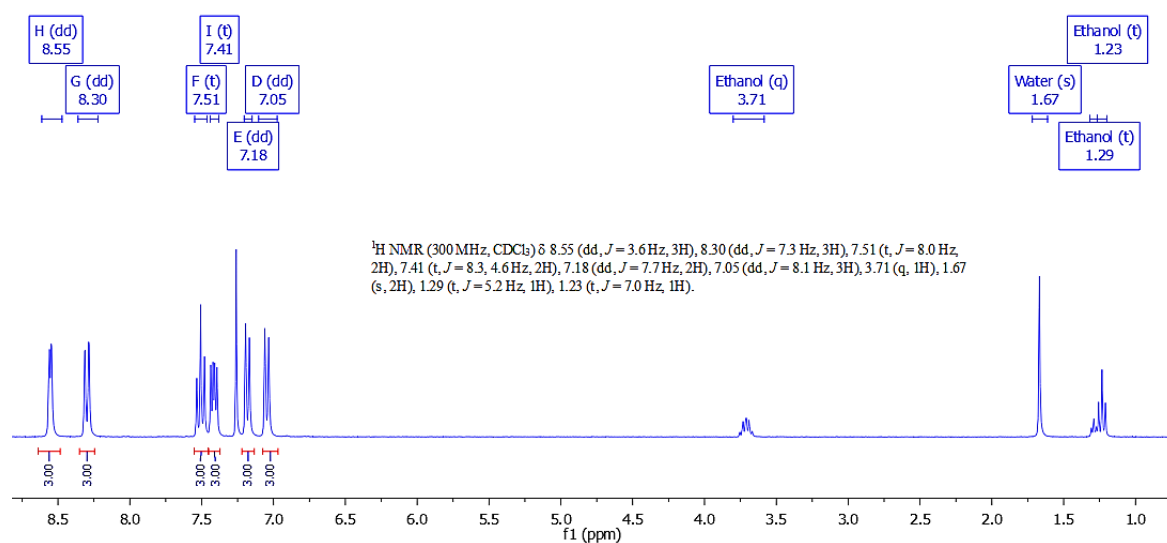

Figure SI3: Solution state <sup>1</sup>H-NMR of [In(Ox)<sub>3</sub>] 2H<sub>2</sub>O (**1**).

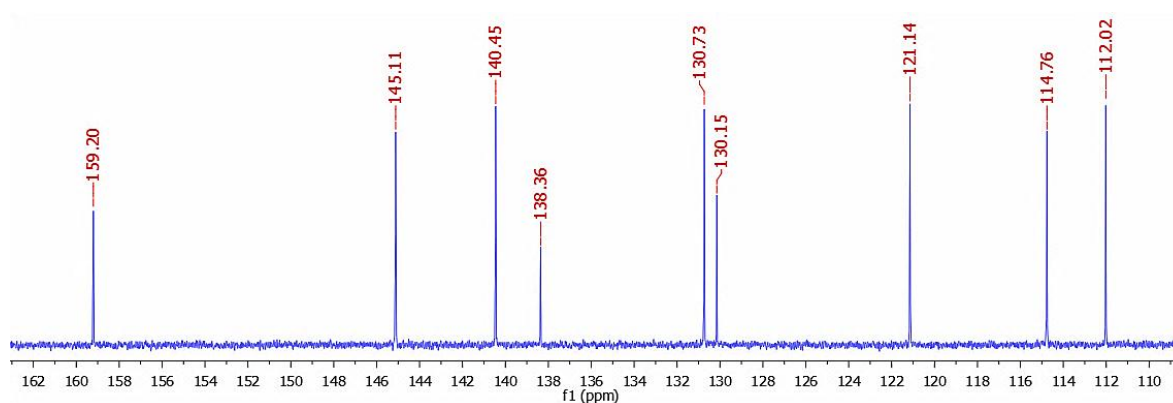

Figure SI4: Solution state <sup>13</sup>C-NMR of [In(Ox)<sub>3</sub>] 2H<sub>2</sub>O (**1**).

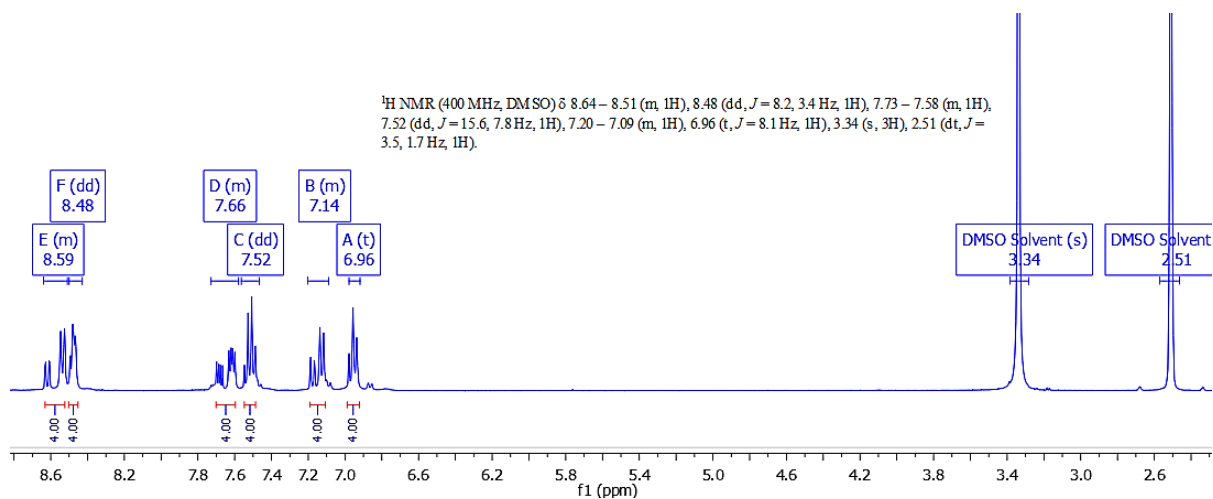

Figure SI5: Solution state <sup>1</sup>H-NMR of {[In<sub>2</sub>(Ox)<sub>2</sub>Cl<sub>2</sub>-μ-[κ<sup>2</sup>-O,O'-(Ox)<sub>2</sub>] C<sub>7</sub>H<sub>8</sub>} (2)

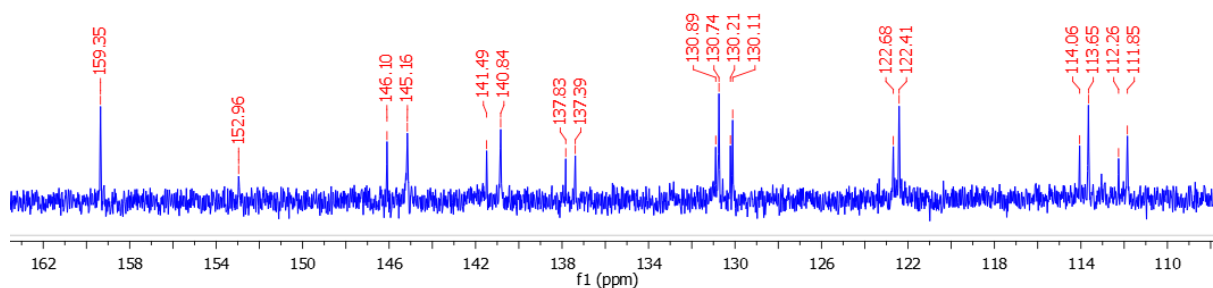

Figure SI6: Solution state <sup>13</sup>C-NMR of {[In<sub>2</sub>(Ox)<sub>2</sub>Cl<sub>2</sub>-μ-[κ<sup>2</sup>-O,O'-(Ox)<sub>2</sub>] C<sub>7</sub>H<sub>8</sub>} (2)

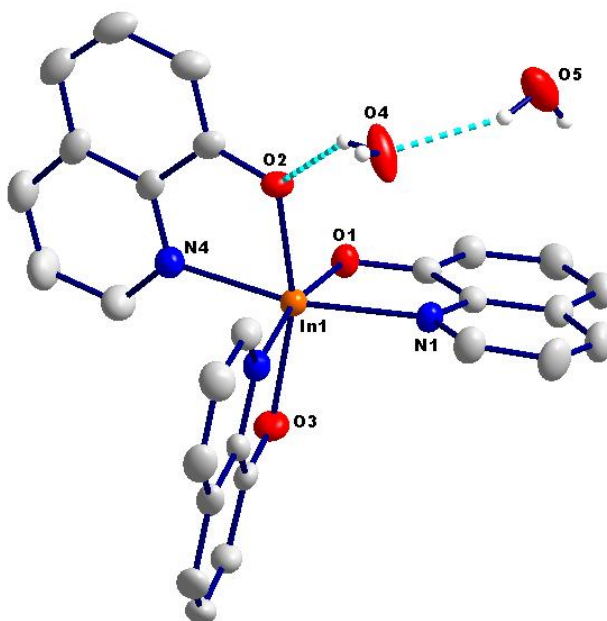

Figure SI7: Crystal structure of 1 with two aqua molecules in an asymmetric unit cell.

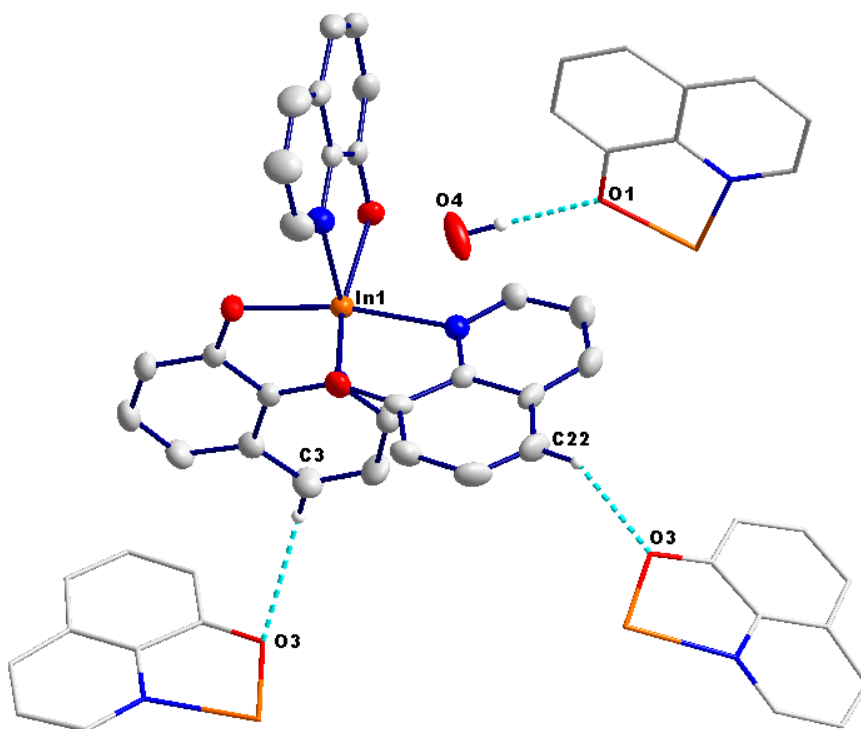

Figure SI8: Crystal structure of 1 exhibiting inter-molecular hydrogen interaction.

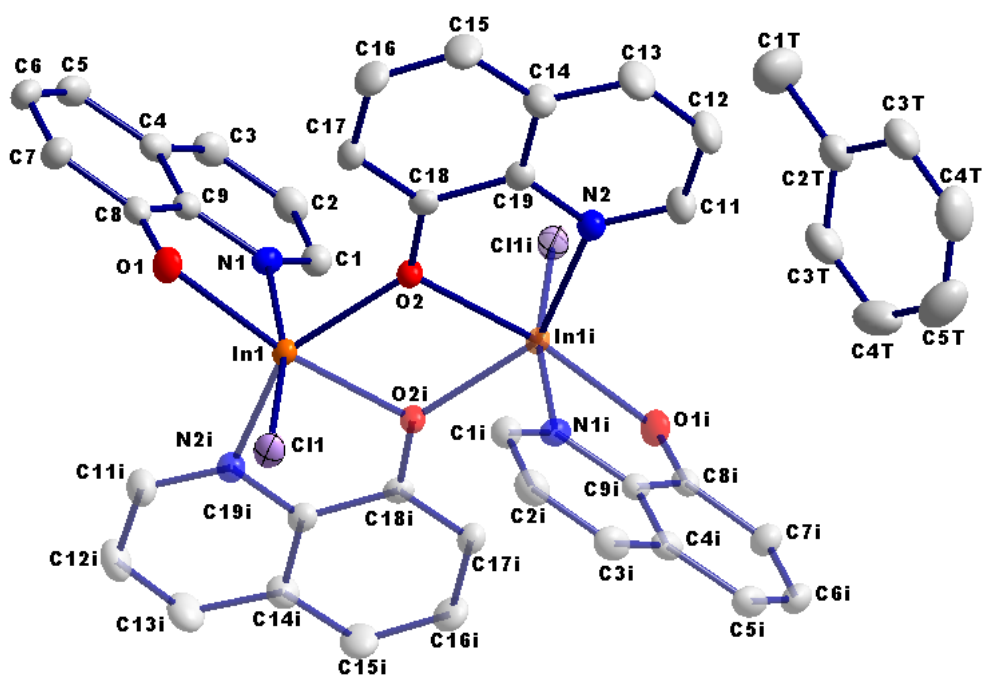

Figure SI9: Symmetry generated crystal structure of 2 with the toluene solvent in the unit cell.

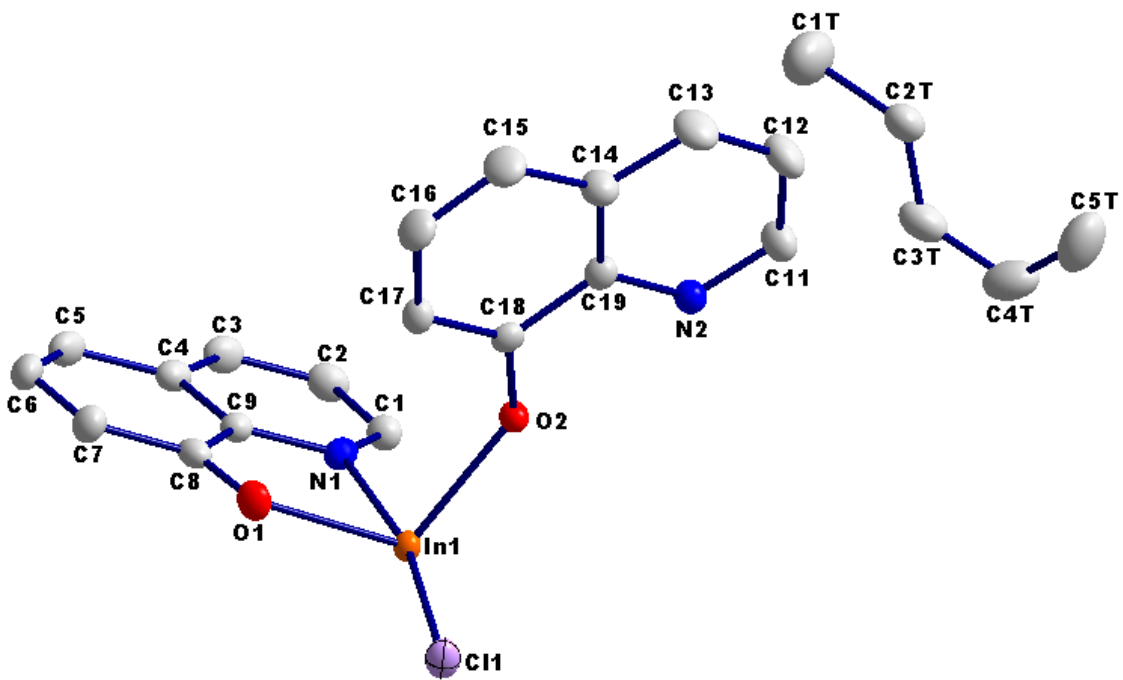

Figure SI10: Crystal structure of 2 with half toluene molecule in an asymmetric unit cell.
